# Supplementary material for: Insecticidal Toxicity of Yersinia frederiksenii Involves the Novel Enterotoxin YacT
Source: PubMed Central journal article supplement (PMC6246891; doi:10.3389/fcimb.2018.00392), 2018-11-14
Supplement: Data_Sheet_1.pdf [file Data_Sheet_1.pdf]

Table S1. Products of genes present in *Y. frederiksenii* and *Y. intermedia*, but absent in *Y. enterocolitica* 22703.

| Gene product                                    | Comment                                       | Category        |
|-------------------------------------------------|-----------------------------------------------|-----------------|
| Ferrichrysoabactin receptor                     |                                               | Iron metabolism |
| AMP-dependent synthetase and ligase             | Degradation of heme to bilirubin              | Iron metabolism |
| Hemin transport protein hmuS                    | Hemin uptake                                  | Iron metabolism |
| 4Fe-4S ferredoxin, iron-sulfur binding          | Intracellular sensing                         | Iron metabolism |
| HmsH protein                                    | Hemin storage                                 | Iron metabolism |
| Nodulin 21-like protein                         | Nodulin/iron and manganese transporter domain | Iron metabolism |
| Dipeptide ABC transporter, ATP-binding protein  | Putative heme uptake                          | Iron metabolism |
| Dipeptide ABC transporter, ATP-binding protein  | Putative heme uptake                          | Iron metabolism |
| Iron-binding protein IscA                       | Iron-sulfur cluster assembly scaffold         | Iron metabolism |
| Lipopolysaccharide biosynthesis protein RffA    |                                               | Lipoprotein     |
| PutativeLipoprotein                             |                                               | Lipoprotein     |
| Putative Lipoprotein                            |                                               | Lipoprotein     |
| Putative Lipoprotein                            |                                               | Lipoprotein     |
| Lipid A biosynthesis lauroyl acyltransferase    |                                               | Lipoprotein     |
| Polymerase Wzy                                  | O-antigen biosynthesis protein                | Lipoprotein     |
| Uncharacterized lipoprotein YfhM                | Cell membrane; lipid-anchor                   | Lipoprotein     |
| Outer membrane lipoprotein carrier protein Lola | Sorting of lipoproteins                       | Lipoprotein     |
| Putative lipoprotein                            |                                               | Lipoprotein     |
| Glycosyl transferase family 2                   | LPS biosynthesis                              | Lipoprotein     |
| Putative inner mebrane protein                  |                                               | Membrane        |
| Conserved integral membrane protein             |                                               | Membrane        |
| Porin B                                         |                                               | Membrane        |
| Putative inner membrane protein                 |                                               | Membrane        |
| Putative outer membrane protein                 |                                               | Membrane        |
| Outer membrane pore protein E                   |                                               | Membrane        |
| Outer membrane protein S1                       |                                               | Membrane        |
| Inner membrane protein YebS                     | Involved in phosphotransfer                   | Membrane        |
| Putative membrane protein Ycjf                  |                                               | Membrane        |
| OmpA domain protein                             |                                               | Membrane        |
| Putative transmembrane protein                  |                                               | Membrane        |
| Inner membrane protein YcdZ                     |                                               | Membrane        |
| Membrane receptor protein                       |                                               | Membrane        |
| Inner membrane protein yecN                     | Three predicted transmembrane domains         | Membrane        |
| Ethanolamine ammonia-lyase heavy chain          | Degradation of amines                         | Metabolism      |
| Ethanolamin permease                            |                                               | Metabolism      |
| Ethanolamine ammonia-lyase light chain          |                                               | Metabolism      |

|                                                 |                                        |            |
|-------------------------------------------------|----------------------------------------|------------|
| Tetrathionate reductase subunit A               |                                        | Metabolism |
|                                                 |                                        |            |
| L-fucose isomerase                              |                                        | Metabolism |
| L-fucose operon activator                       |                                        | Metabolism |
| Fucose isomerase domain protein                 |                                        | Metabolism |
| L-fucose-proton symporter                       |                                        | Metabolism |
| L-fucose mutarotase                             |                                        | Metabolism |
| L-rhamnose isomerase                            |                                        | Metabolism |
| L-rhamnose mutarotase                           |                                        | Metabolism |
| L-rhamnose-proton symporter                     |                                        | Metabolism |
| Cobalamin biosynthesis protein cbiB             |                                        | Metabolism |
| N-acetylglucosamine-6-phosphate deacetylase     |                                        | Metabolism |
| N-acetylmannosamine-6-phosphate 2-epimerase     |                                        | Metabolism |
| Vitamin B12 import ATP-binding protein BtuD     |                                        | Metabolism |
| Vitamin B12-binding protein                     |                                        | Metabolism |
| Ammonia channel                                 |                                        | Metabolism |
| DsdX permease                                   | Gluconate transport                    | Metabolism |
| $\alpha$ -ketoglutarate permease                |                                        | Metabolism |
| Xylose isomerase domain protein TIM barrel      |                                        | Metabolism |
| Formate transporter 1                           |                                        | Metabolism |
| DeoX-like                                       | Deoxyribose mutarotase                 | Metabolism |
| Cellulase synthase operon protein               |                                        | Metabolism |
| Thiamine biosynthesis lipoprotein ApbE          |                                        | Metabolism |
| Ornithine carbamoyltransferase                  |                                        | Metabolism |
| Inducible histidine transporter                 |                                        | Metabolism |
| Histidine utilization repressor                 |                                        | Metabolism |
| $\beta$ -lactamase domain protein               | Beta-lactamase                         | Resistance |
| Antibiotic biosynthesis monooxygenase           | Biosynthesis of several antibiotics    | Resistance |
| AbgT family protein                             | Putative drug efflux pump              | Resistance |
| Acriflavine resistance protein B                |                                        | Resistance |
| Uncharacterized inner membrane transporter YhbE | DMT family, putative drug permease     | Resistance |
| Innermembrane transport protein YdhC            | Putative drug resistance transporter   | Resistance |
| Uncharacterized GST-like protein YghU           | Putative detoxification of xenobiotics | Resistance |
| Arsenical pump membrane protein                 |                                        | Resistance |
| Integral membrane protein                       | DMT family, putative drug efflux pump  | Resistance |
| Lactoylglutathione lyase                        | Detoxification of methylglyoxal        | Resistance |
| Microcin-24                                     | Bacteriocin                            | Resistance |
| Heavy metal efflux pump, CzcA family            |                                        | Resistance |
| Glyoxalase/bleomycin resistance                 |                                        | Resistance |
| Cation/multidrug efflux pump                    | -                                      | Resistance |
| Uncharacterized GST-like protein YghU           | Putative detoxification of xenobiotics | Resistance |
| Multidrug resistance protein MdtG               | Resistance to bile salt and fosfomycin | Resistance |
| Arsenate reductase                              |                                        | Resistance |

|                                                   |                                                                                 |                                          |
|---------------------------------------------------|---------------------------------------------------------------------------------|------------------------------------------|
| PTS permease protein                              | Phosphotransferase system                                                       | Secretion                                |
| YeeE/YedE                                         | Secretory pathway                                                               | Secretion                                |
| Twin-arginine translocation pathway signal        | Transport of folded protein                                                     | Secretion                                |
| Efflux transporter, RND family, MFP subunit       |                                                                                 | Secretion                                |
| Tricarboxylic transport                           |                                                                                 | Secretion                                |
| Efflux transporter, RND family                    |                                                                                 | Secretion                                |
| Tricarboxylic transport                           |                                                                                 | Secretion                                |
| Tricarboxylic transport                           |                                                                                 | Secretion                                |
| YeeE/YedE family protein                          | Secretory pathway                                                               | Secretion                                |
| Arginine-binding periplasmic protein 1            | ABC-transporter                                                                 | Secretion                                |
| Magnesium transporter                             |                                                                                 | Secretion                                |
| Outer membrane efflux protein                     | Similar to heavy metal RND efflux OMP                                           | Secretion                                |
| Two-component sensor kinase                       |                                                                                 | Sensing, signalling and regulation (SSR) |
| Carbonic anhydrase                                | CO <sub>2</sub> sensing, putative role in pH regulation and virulence induction | SSR                                      |
| Transcriptional regulatory protein BaeR           |                                                                                 | SSR                                      |
| Transcriptional regulatory protein                |                                                                                 | SSR                                      |
| HTH-type transcriptional regulator DsdC           |                                                                                 | SSR                                      |
| Starvation-sensing protein rspA                   | Putative HSL degradation                                                        | SSR                                      |
| 3-oxoacyl-[acyl-carrier-protein] reductase        |                                                                                 | SSR                                      |
| AraC-family transcriptional regulator             | Putative stress response                                                        | SSR                                      |
| Sensor kinase dpiB                                |                                                                                 | SSR                                      |
| Putative transcriptional regulator                |                                                                                 | SSR                                      |
| Transcriptional regulatory protein TctD           |                                                                                 | SSR                                      |
| 3-oxoacyl-[ACP] synthase                          |                                                                                 | SSR                                      |
| Transcriptional regulatory protein                |                                                                                 | SSR                                      |
| Transcriptional regulator                         | <i>B. thuringiensis</i> regulator MarR                                          | SSR                                      |
| 3-oxoacyl-[acyl-carrier-protein] reductase        | Involved in covalent fatty acid acylation of RTX-toxins                         | SSR                                      |
| Acetoacetate metabolism regulatory protein AtoC   |                                                                                 | SSR                                      |
| HTH-type transcriptional activator RhaR           |                                                                                 | SSR                                      |
| Response regulator                                |                                                                                 | SSR                                      |
| Transcriptional regulator, LysR family            |                                                                                 | SSR                                      |
| PAS/PAC domain                                    |                                                                                 | SSR                                      |
| LysR-family regulatory protein                    |                                                                                 | SSR                                      |
| Signal transduction histidine-protein kinase AtoS |                                                                                 | SSR                                      |
| HTH-type transcriptional activator RhaS           |                                                                                 | SSR                                      |
| Diguanylate cyclase with PAS/PAC sensor           |                                                                                 | SSR                                      |
| Transcriptional regulatory protein                |                                                                                 | SSR                                      |
| AraC-type DNA-binding domain-containing protein   |                                                                                 | SSR                                      |

|                                               |                                                                            |                 |
|-----------------------------------------------|----------------------------------------------------------------------------|-----------------|
| Transcriptional regulator, LysR family        |                                                                            | SSR             |
| Predicted transcriptional regulator           | DeoR family, similar to <i>Legionella</i> regulator                        | SSR             |
| Predicted transcriptional regulator           | MerR family regulator, putative response to oxidative stress, heavy metals | SSR             |
| Transcriptional regulator                     |                                                                            | SSR             |
| Sensor protein RstB                           |                                                                            | SSR             |
| Two-component system response regulator       |                                                                            | SSR             |
| Transcriptional regulator                     |                                                                            | SSR             |
| Putative kinase inhibitor                     | Phospholipid-binding protein                                               | SSR             |
| HTH-type transcriptional regulator TreR       |                                                                            | SSR             |
| Predicted transcriptional regulator           |                                                                            | SSR             |
| Universal stress protein F                    |                                                                            | Stress response |
| Heat shock protein 15                         |                                                                            | Stress response |
| Member of the Nips/Nap superfamily            | Putative role in vesicular transport                                       | Transport       |
| Uncharacterised symporter YihO                | GPH-cation symporter family                                                | Transport       |
| Extracellular solute-binding protein family 5 | ABC-transporter                                                            | Transport       |
| Lysine-specific permease                      |                                                                            | Transport       |
| MFS-family transporter                        | Secondary active transport                                                 | Transport       |
| D-galactonate transporter                     |                                                                            | Transport       |
| Arabinose import ATP-binding protein araG 2   | ABC-transporter                                                            | Transport       |
| Sugar ABC transporter, periplasmic protein    |                                                                            | Transport       |
| Sugar ABC transporter                         |                                                                            | Transport       |
| ABC transporter related                       |                                                                            | Transport       |
| Arginine/ornithine antiporter                 | ABC transporter                                                            | Transport       |
| Ribose ABC transporter                        |                                                                            | Transport       |
| Short-chain fatty acids transporter           |                                                                            | Transport       |
| Inner-membrane translocator                   |                                                                            | Transport       |
| PTS system, glucose-like                      |                                                                            | Transport       |
